# Supplementary material for: CD86+/CD206+, Diametrically Polarized Tumor-Associated Macrophages, Predict Hepatocellular Carcinoma Patient Prognosis
Source: PubMed Central journal article supplement (PMC4813183; doi:10.3390/ijms17030320), 2016-03-01
Supplement: ijms-17-00320-s001.pdf [file ijms-17-00320-s001.pdf]

# Supplementary Materials: CD86<sup>+</sup>/CD206<sup>+</sup>, Diametrically Polarized Tumor-Associated Macrophages, Predict Hepatocellular Carcinoma Patient Prognosis

Pingping Dong, Lijie Ma, Longzi Liu, Guangxi Zhao, Si Zhang, Ling Dong, Ruyi Xue and She Chen

**Table S1.** Descriptive statistics of immunohistochemical variables.

| Variable #              | Mean | SD   | Median | Range |
|-------------------------|------|------|--------|-------|
| CD68 <sup>+</sup> TAMs  | 64.3 | 21.6 | 67.3   | 8–112 |
| CD86 <sup>+</sup> TAMs  | 41.5 | 19.3 | 36.7   | 5–93  |
| CD206 <sup>+</sup> TAMs | 30.5 | 14.8 | 33.3   | 5–78  |

TAM: Tumor-associated macrophage; SD: Standard deviation. #: Number of cells per field (×200 magnification).
